# Supplementary material
Source: PubMed Central journal article supplement (PMC5248969)
Supplement: NIHMS840543-supplement.pdf [file NIHMS840543-supplement.pdf]

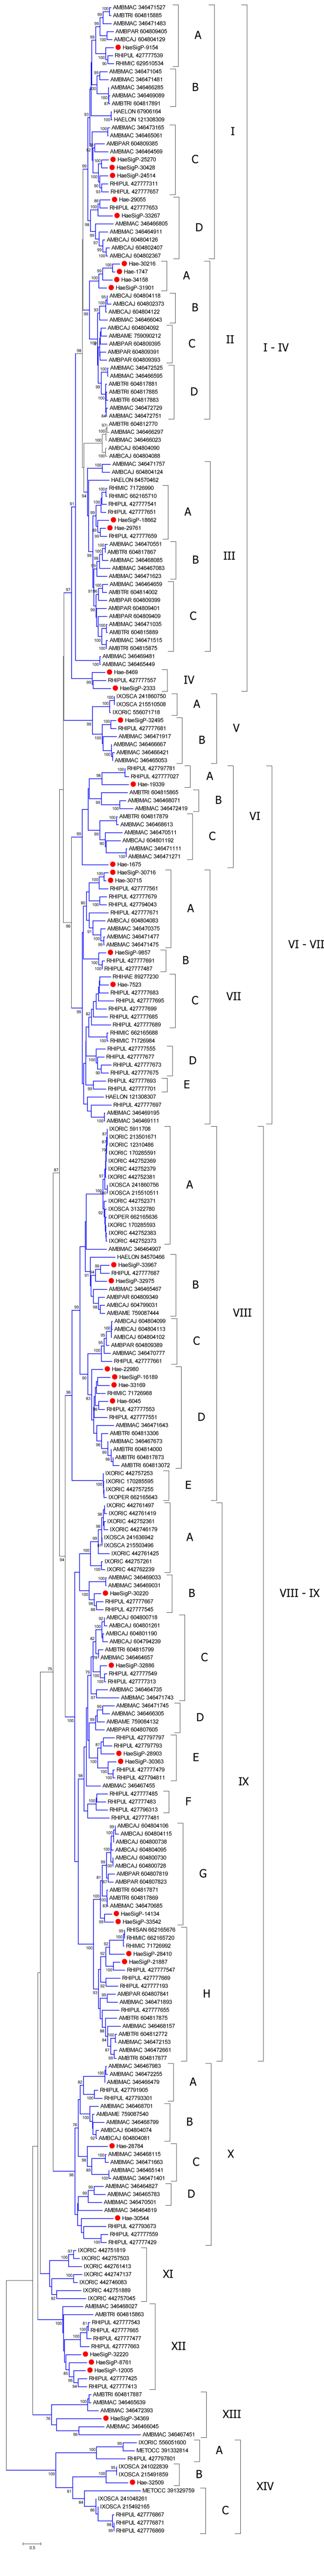

**Supplemental figure 1. Evolutionary relationships of tick metalloproteases of the repolysin family.** The evolutionary history was inferred using the Neighbor-Joining method [1]. The optimal tree with the sum of branch length = 114.06814666 is shown. The percentage of replicate trees in which the associated taxa clustered together in the bootstrap test (1000 replicates) are shown next to the branches [2]. The tree is drawn to scale, with branch lengths in the same units as those of the evolutionary distances used to infer the phylogenetic tree. The evolutionary distances were computed using the Poisson correction method [3] and are in the units of the number of amino acid substitutions per site. The rate variation among sites was modeled with a gamma distribution (shape parameter = 1). The analysis involved 316 amino acid sequences. All ambiguous positions were removed for each sequence pair. There were a total of 1623 positions in the final dataset. Evolutionary analyses and part of this legend writing were conducted in MEGA6 [4]. The *Hyalomma excavatum* sequences are recognized by a red symbol. Other sequences are represented by the three first letters of the genus name followed by the first three letters of the species name followed by their NCBI gi| accession number.

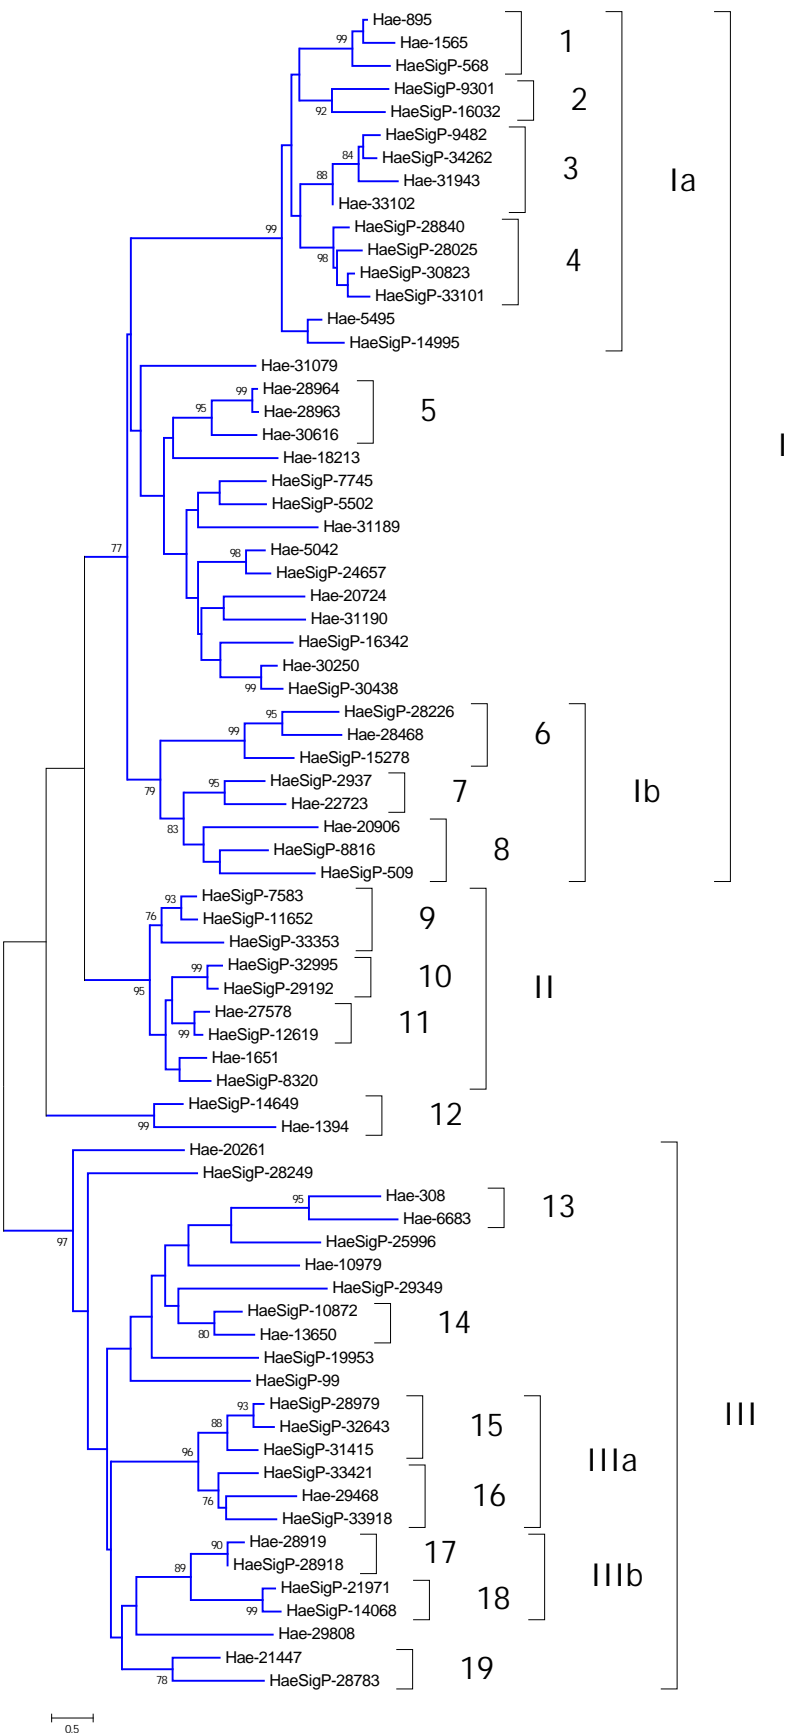

**Supplemental figure 2. Evolutionary relationships of Group I lipocalins of *Hyalomma excavatum*.**

The evolutionary history was inferred using the Neighbor-Joining method [1]. The optimal tree with the sum of branch length = 69.61982398 is shown. The percentage of replicate trees in which the associated taxa clustered together in the bootstrap test (1000 replicates) are shown next to the branches [2]. The tree is drawn to scale, with branch lengths in the same units as those of the evolutionary distances used to infer the phylogenetic tree. The evolutionary distances were computed using the Poisson correction method [3] and are in the units of the number of amino acid substitutions per site. The rate variation among sites was modeled with a gamma distribution (shape parameter = 1). The analysis involved 73 amino acid sequences. All ambiguous positions were removed for each sequence pair. There were a total of 433 positions in the final dataset. Evolutionary analyses and this legend writing were conducted in MEGA6 [4].



**A**

```

RHIPUL_427790287  --KSLRTFAARKATA AVVIGACVLI V-SLSTASGDVDRCDPSSVRDQVVTWTVLWREEFKPSPEGEYDEEELKRGCLL  I-KKFPCHQY-LANGSVAVTGDRHICERQVEILRNICVDVNTKESHAIKELNVEKKEEGARTLAPTSNQCAGKPPAPSLRENK  165
RHIPUL_427790285  --KSLRTFAARKATA AVVIGACVLI V-SLSTASGDVDRCDPSSVRDQVVTWTVLWREEFKPSPEGEYDEEELKRGCLL  I-KKFPCHQY-LANGSVAVTGDRHICERQVEILRNICVDVNTKESHAIKELNVEKKEEGARTLAPTSNQCAGKPPAPSLRENK  165
RHIPUL_427790289  --KSLRTFAARKATA AVVIGACVLI V-SLSTASGDVDRCDPSSVRDQVVTWTVLWREEFKPSPEGEYDEEELKRGCLL  I-KKFPCHQY-LANGSVAVTGDRHICERQVEILRNICVDVNTKESHAIKELNVEKKEEGARTLAPTSNQCAGKPPAPSLRENK  165
HaeSigP-25702     --KSLRLVRRKQVTVWVYVQVDSGASVREIVLISKEAIIWDEEFKPSPEGEYDEEELKRGCLL  I-KKFPCHQY-LANGSVAVTGDRHICERQVEILRNICVDVNTKESHAIKELNVEKKEEGARTLAPTSNQCAGKPPAPSLRENK  167
AMBTRI_604811701  --MRCGAKRLPSTAYALFLLSGALLVASDQGLPEEDCPEDVSKYANVETLWVRPKGADAGEGVETNDEAKRCE  I-KAKVECHQR-ACGPEEVRNRFRIRREGEAVRDLFCNEAARADYTVRQDGEFVQDHQKQEQIIPEN  I-KDPTCKLSBA  160
AMBAME_759089856  -----MASPPHPRKLFAPVVELLSAALELVLAGVSEHPNPSLSRQVEVDRAALVGS-GROPG-----NDQVAGCRS  I-KMSSLCHRT-ISSCPKAVKANSRQERQVEALRDIWCEQAFQDREAKSQQDGAQLQTEDEQVPPFLPEN  I-EMDYGRLRBA  155
AMBAME_759089796  -----MRRFESLLELLLVITASADQ-DRESLKAIRNAEYALRRRQSHQPKPQGTGDR-KTLAGAKAK  I-TLRSKYETE-FHSEQDVKAKLSFDESKWISVVEKNAEEDKWKIIEELDIWLLAQESQKRNQAQAGQ-----NOEERTSBJ  141
AMBTRI_604811551  -----ML-----LLAFLQVVASAQCQDPSVEAIKTQVRELAKVVRDE-LHPDEIGNI NDELEIRECRE  I-LSRSDQYNE-LSLCSQDVNTWAFLEEGKQKLRDF-CKDKALKGLYKLVPCVDVHIWKEQRKLPDALKEC-----VDECRASL  140
AMBTRI_604811735  -----MSTLSEFKRRRAI FYASAFLLSFAAGTAEVGRSPPELLIECTKEGIADQVTVGVVQVRELOVNAEQFNEAVRRACGA  I-LDTSSCYVG-FTRQPSMSNFTRREGEVRMFRFTVNTCEALKAAI SIKNQDPEKI RTIIVRHGLNRTDAR-----FEELLRWLE  166
AMBTRI_604811733  -----MSTLSEFKSRAL FYASAFLLSFAAGTAEVGRSPPELLIECTKEGIADQVTVGVVQVRELOVNAEQFNEAVRRACGA  I-LDTSSCYVG-FTRQPSMSNFTRREGEVRMFRFTVNTCEALKAAI SIKNQDPEKI RTIIVRHGLNRTDAR-----FEELLRWLE  166
AMBTRI_604811930  -----MFKCGIERTAAFRVAHWLSCAVSAPQDQESTGTELETTGCIARETITQNRNYSYSPVSDI T L S D T I N V E V E G  I-FNETSICYAF-FDRQPSMSNFTRREGEVRMFRFTVNTCEALKAAI SIKNQDPEKI RTIIVRHGLNRTDAR-----FEELLRWLE  166
HaeSigP-2457     -----MGLLVKLLBAEFLLATMIAAIIIGVIVREQVAEHWNLAAARNARIPLTE-IIEDESKYLRLCDNN-PFRFEDNI CKQTWGSQENITKEASMERGTSLRAALISEERGSAAQLGRQVGLVIGAKDQVNN-TDSFEE-----VDQRITAEIN  156
Hae-33196       -----CNRNVAEHWGLATTIGVQPFTE-IIEGPNYLRLCDNN-PFRFEDNI CKRTWGSQENITKEASMERGTSLRAALISEERGSAAQLGRQVGLVIGAKDQVNN-TDRFEE-----IDRRITAEIN  126
AMBTRI_604811681  -----MTHFRRLVAVLLAAVITABSROGIVYRNMADQVSPASQGVPLTE-IIEDESKYLRLCDNN-PFRFEDNI CKRTWGSQENITKEASMERGTSLRAALISEERGSAAQLGRQVGLVIGAKDQVNN-TDRFEE-----IDRRITAEIN  155
AMBCAJ_604794641 -----MAASQVACQAVI FATVLCGEEKKLECDVITWAGTQICADQGVVPLTN-TYDKNYYLENLCGER--DQFAEPRKQVY-SPSGDEDEKKTAMERGTALREASDSQCEKVALRDQVLEVI AKGDAHPENKQTFEGS-----VEANKQGEN  155
AMBTRI_604811900  -----MASVSAAVLVLLAGI GAVACDRCHNETKATTQVWNLALHGVVEKPK-----EHSVDLQNI CTE  I-PDVEVSGSFG-IDDCGKEEKEWFRDQENGRMLKRMBAI MCKEARQLIIGITNITALENEVDFA--AEYSTEN-----AQHNDI AAKK  147
AMBTRI_604811898  -----MASVSAAVLVLLAGI GAVACDRCHNETKATTQVWNLALHGVVEKPK-----EHSVDLQNI CTE  I-PDVEVSGSFG-IDDCGKEEKEWFRDQENGRMLKRMBAI MCKEARQLIIGITNITALENEVDFA--AEYSTEN-----AQHNDI AAKK  147
AMBTRI_604811902  -----MAVFFCVRRIGLVNLCVITFFLFCGQGTPTNTRCTRBAAFHVDVWRLEFKGAQALAD--EGKYBAALEEKRR-----IKDKLPHKE-LALCPN--ASKFLQERGRVSLSDIICDTQCKBSVWASSQCKPKLIDLVEVFSHYDDPPK--DENARLRRIRG  158
AMBTRI_604811886  -----MASNVAALVWVGGVAAI AEGSFSNSVRSADLYHGHVHNLKQGVVDRLPPEPKDFEFESFCARDK--DMLRKKPKYF-VSGCENRQKHFHELGDVFLRLLSII DMETGLAPFLHI LLDADAIKMFVERHAEOSLYNFR-----KKSIGMID  153
HaeSigP-10029  -----NESVTLMLACVLLALHALLAFTTEPPVPEVENAVWFDRESEVSLVFKLELLNEDSGNBTSLSAQF--FAESTGQLS-IDHEKNEIDCFARSDEKATRGLVCDASSLQALVRISSLLNDRMRKQVSPKREPEHINPR-----EHWVCFAB  155
ruler           10 20 30 40 50 60 70 80 90 100 110 120 130 140 150 160 170

```

```

RHIPUL_427790287  EIACFDAFN--SCPLSMTTAKAAVTRVNAAL LKGCES  ANVVVSRGFLVLLVVPFI MWLST-----  230
RHIPUL_427790285  EIACFDAFN--SCPLSMTTAKAAVTRVNAAL LKGCES  ANVVVSRGFLVLLVVPFI MWLST-----  230
RHIPUL_427790289  EIACFDAFN--SCPLSMTTAKAAVTRVNAAL LKGCES  ANVVVSRGFLVLLVVPFI MWLST-----  230
HaeSigP-25702     EIACFDAFN--SCPLSMTTAKAAVTRVNAAL LKGCES  ANVVVSRGFLVLLVVPFI MWLST-----  232
AMBTRI_604811701  NIECVTAFS--NCGILSKSAKALLKGEAVLLADNG  I-SSFLASGCLLI AAVAVLLRMSLSLGF-----  228
AMBAME_759089856  ATTVDFAFR--KCSMILSKAKAAFTKGS AVLMLTGN  I-ASLFLVAHQHLLAVVLLRLRSISCG-----  221
AMBAME_759089796  MEKGAETFP--KSCPADQEVATAFKRVGTASLLLSGSS  I-SOARLAESFEI VALLASII LLMKRSIQG-----  210
YTTGTEIAR--QSCRKEDEDFASFKRLSAAVWVLSGER  I-SGATLVPHITII VGLAAVLLRKYET-----  206
AMBTRI_604811735  ERDCKNGLS--VCPVLEEI KASVARSNLELLHDSR  I-VTGAI ASTS IDGGRDAVTHGDESHPVCK-----  237
AMBTRI_604811733  ERAQVKNLS--VCPVWLEEI KASVARSIGLELLHDSR  I-VTGAI ASTS IDGGRDAVTHGDESHPVCK-----  237
AMBTRI_604811930  QKACDPAWV--ASCIHLEARNVAVTIVIGELI HDERM  I-QR--KPKRSINASDREPERICTAEISELGL--QRKAL--VLLLEKVAEYAYKKEIENAKI AH-----  273
HaeSigP-2457     LKVCVEALK--CNKRKNADAI SHLRKI DAVWDLRFSD  I-SSI ARTACLDKVAASLLLYYYFN-----  223
Hae-33196       LKACVDEALR--CNATONTAAI SHLREI DAI I DLRLSD  I-LPI RTAPAAADNAA-----  181
HaeSigP-17505   LRI CVNEALK--CAKONASAI SHLRKI AAVWDLRFKLD  I-PNTAPTACAARNVVASLLGLLYHYLY-----  222
AMBTRI_604811681  LKKLALAAVK--PCEKONACN ACIDKATAI I DLSISD  I-GNSASRTMAAGVMSLELLIFR-----  224
AMBCAJ_604794641 LKAKLDKAVK--PCAGKQAGSI AHLDKI ATAI VDLHTFSD  I-GRNSARTNAANAII AAVSLVARSLLY-----  222
AMBTRI_604811900  LSKLQDYSLK--PCCKMTAI REMLKDI AKGVTELLTKAPL  I-LVPPSPSTIGASTITTESPASTIIGVSTIPEPILEGPI SHEPIEGSTIHEP SERPSTCSSTOAPITTPAPPSAAPS MHAVGAFSFI AFALLARGA-----  284
AMBTRI_604811898  LSKLQDYSLK--PCCKMTAI REMLKDI AKGVTELLTKAPL  I-LVPPSPSTIGASTITTESPASTIIGVSTIPEPILEGPI SHEPIEGSTIHEP SERPSTCSSTOAPITTPAPPSAAPS MHAVGAFSFI AFALLARGA-----  284
AMBTRI_604811902  LSKLQDYSLK--PCCKMTAI REMLKDI AKGVTELLTKAPL  I-LVPPSPSTIGASTITTESPASTIIGVSTIPEPILEGPI SHEPIEGSTIHEP SERPSTCSSTOAPITTPAPPSAAPS MHAVGAFSFI AFALLARGA-----  284
HaeSigP-19237  TQACVETVAETCPVPLESARPVYTRTHEALADLGEER  I-NGSTLSSAVGLLFAMLAAVVRVY-----  227
AMBTRI_604811886  VSYGVKALE--KCESEGHAGNLSVHVALDAATQNVDE  I-VEVEPTPS--KATITLIPPEASTEVLTETVSKLIEVYVLTIKPIKEPTSESSAATCIHTEH-----  262
HaeSigP-10029  SLRVEGVK--EKGTEIENQELFRKVFASNSVNEVAL  I-ASGASATTHAFVFGALG-----  214
ruler           100 190 200 210 220 230 240 250 260 270 280 290 300 310 320 330 340 350

```

**B**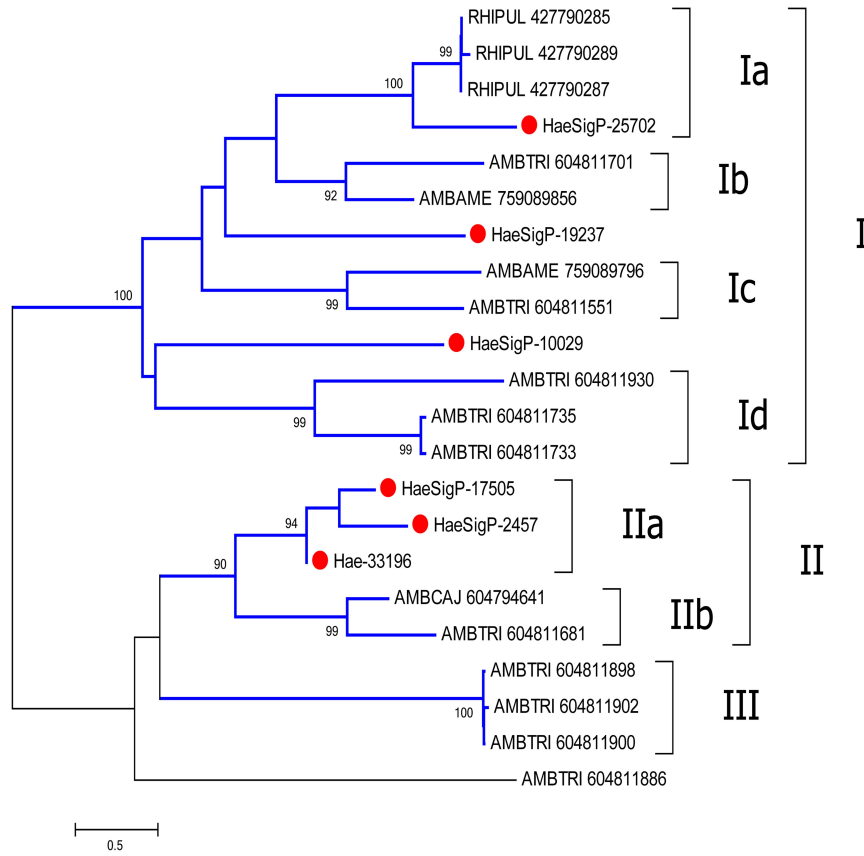**Supplemental figure S4. Evolutionary relationships of the novel 22 kDa protein family of metastriate ticks.**

A) Clustal alignment. B) Phylogram of the alignment in A. The evolutionary history was inferred using the Neighbor-Joining method [1]. The optimal tree with the sum of branch length = 21.84913049 is shown. The percentage of replicate trees in which the associated taxa clustered together in the bootstrap test (1000 replicates) are shown next to the branches [2]. The tree is drawn to scale, with branch lengths in the same units as those of the evolutionary distances used to infer the phylogenetic tree. The evolutionary distances were computed using the Poisson correction method [3] and are in the units of the number of amino acid substitutions per site. The rate variation among sites was modeled using a gamma distribution (shape parameter = 1). The analysis involved 22 amino acid sequences. All ambiguous positions were removed for each sequence pair. There were a total of 389 positions in the final dataset. Evolutionary analyses and part of this legend were conducted in MEGA6 [4]. The *Hyalomma excavatum* sequences are recognized by a red symbol. Other sequences are represented by the three first letters of the genus name followed by the first three letters of the species name followed by their NCBI gi| accession number.
